# Supplementary material
Source: PubMed Central journal article supplement (PMC5500408)

### Supplemental Figure S1. Assessment of PD-L1 Assay Sensitivity and Specificity.

(A) monoclonal antibody against PD-L1 was tested using high (H820), medium (H441), low (SU-DHL1) and negative (Colo205, H23) PD-L1-expressing cell lines to determine assay sensitivity and specificity. At the optimal antibody concentration, mean H820 PD-L1 expression was determined to be 142-fold higher than mean background staining in negative controls. Representative images of high (B) medium (C) and negative (D) expressing cell line controls are shown.

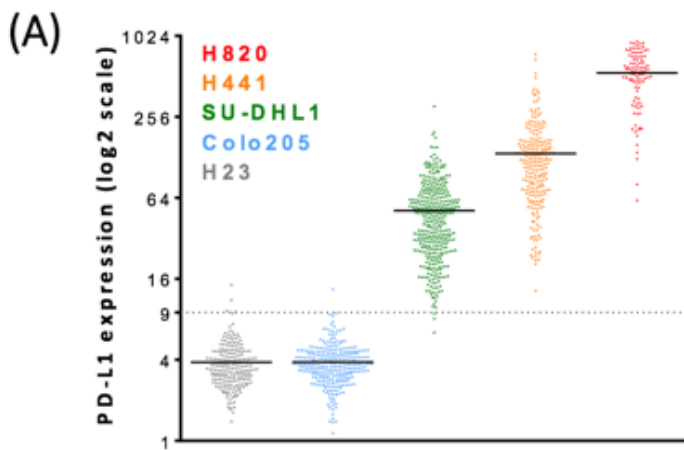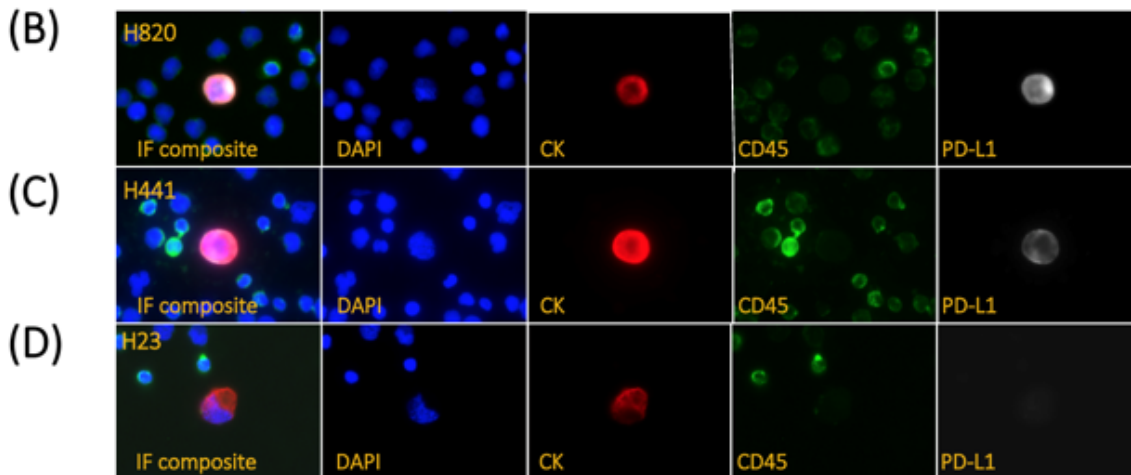

Supplement: NIHMS865417-supplement-1.pdf [file NIHMS865417-supplement-1.pdf]
