# Supplementary material
Source: PubMed Central journal article supplement (PMC5500408)

## Supplemental Figure S2. Circulating Cells Associated with Malignancy (CCAM) Enumeration by Histology and Stage.

Enumeration comparisons by histology of (A) CCAMs and (B) PD-L1(+) CCAMs in patients with non-zero CCAM counts. Enumeration comparisons by AJCC Stage of (C) CCAMs and (D) PD-L1(+) CCAMs. Box plots denote median and 25<sup>th</sup>/75<sup>th</sup> quantiles, with whiskers denoting the area up to 5<sup>th</sup>/95<sup>th</sup> quantiles, respectively. Points greater than 95<sup>th</sup> percentile or lower than 5<sup>th</sup> percentile are denoted as individual dots. (Online only).

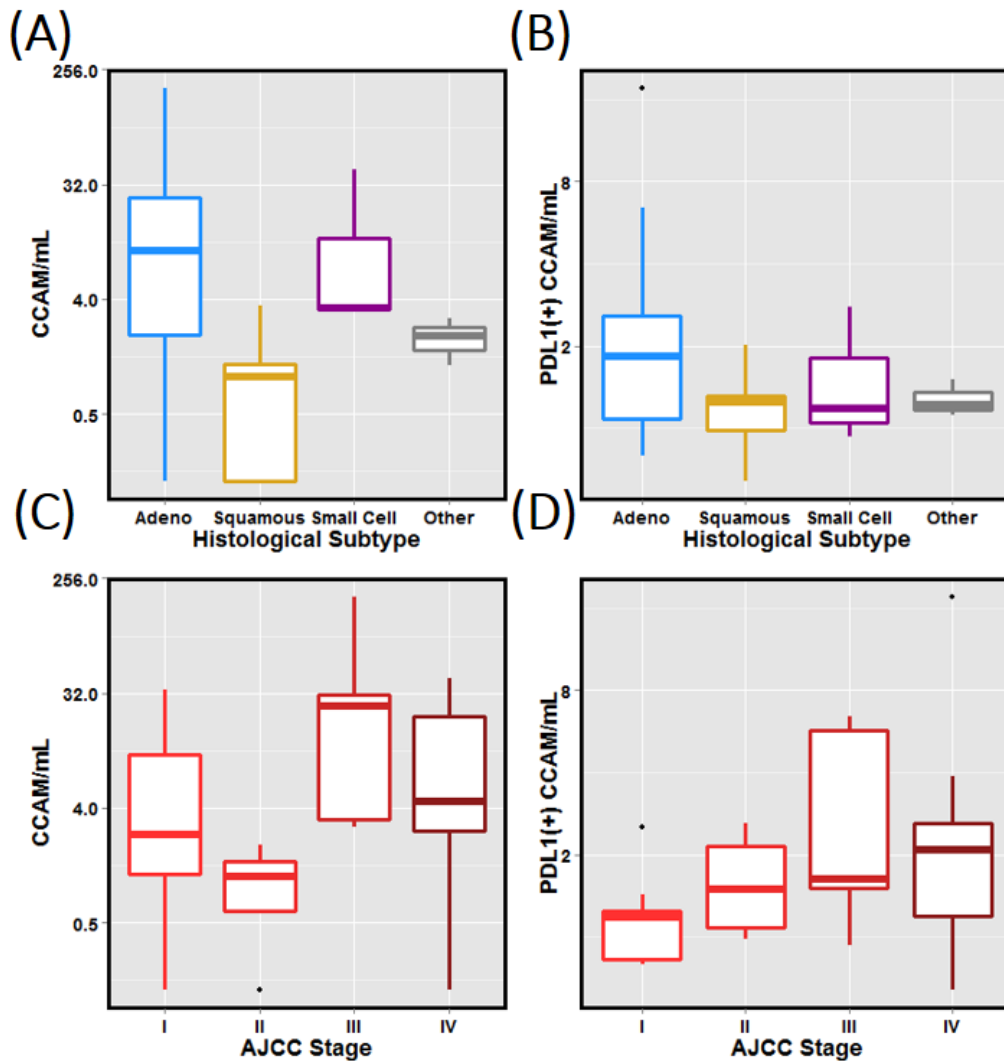

Supplement: NIHMS865417-supplement-2.pdf [file NIHMS865417-supplement-2.pdf]
