# Supplementary material
Source: PubMed Central journal article supplement (PMC5500408)

**Supplemental Figure S3. CK(-)PD-L1(+) Circulating Cells Associated with Malignancy (CCAM) at Diagnosis is a Prognostic Factor for Overall Survival in Lung Cancer Patients.**

Kaplan-Meier estimates of overall survival of patients stratified by those with > 1.1 CK(-)PD-L1(+) CCAM (gold line) or ≤ 1.1 CK(-)PD-L1(+) CCAM (blue line). (Online only).

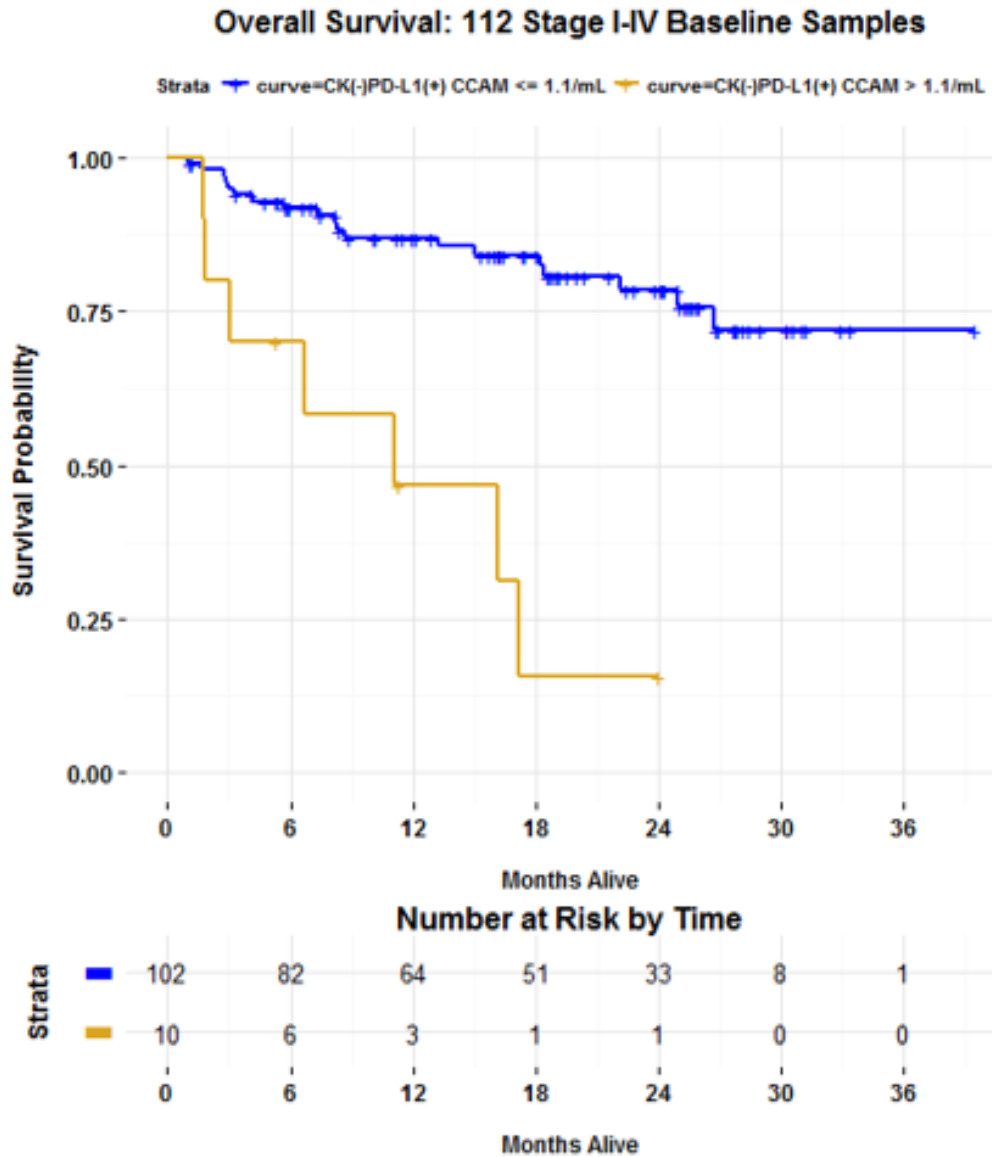

Supplement: NIHMS865417-supplement-3.pdf [file NIHMS865417-supplement-3.pdf]
