# Supplementary material
Source: PubMed Central journal article supplement (PMC5500408)
Supplement: NIHMS865417-supplement-4.pdf [file NIHMS865417-supplement-4.pdf]

**Supplemental Table S1. Cox Proportional Hazards Model of Patients With Confirmed Lung Cancer.**

| <b>Covariate Level</b>           | <b>N</b> | <b>HR</b> | <b>LCL</b> | <b>UCL</b> | <b>p-Value</b> |
|----------------------------------|----------|-----------|------------|------------|----------------|
| <b>Tumor AJCC Stage</b>          |          |           |            |            |                |
| I-III                            | 93       | Ref       |            |            |                |
| IV                               | 19       | 3.27      | 1.46       | 7.31       | 0.004          |
| <b>PD-L1(+) CCAM Enumeration</b> |          |           |            |            |                |
| ≤ 1.1/mL                         | 98       | Ref       |            |            |                |
| > 1.1/mL                         | 14       | 3.85      | 1.64       | 9.09       | 0.002          |

HR = Hazard ratio

LCL = Lower confidence limit

UCL = Upper confidence limit

AJCC = American Joint Committee on Cancer

CCAM = Circulating Cells Associated with Malignancy
